# Supplementary material for: Hybrid phytoglycogen-dopamine nanoparticles as biodegradable underwater adhesives
Source: Royal Society of Chemistry journal article supplement (doi:10.1039/d4sm01454e), 2025-01-01
Supplement: d4sm01454e1.pdf [file d4sm01454e1.pdf]

## Supplementary Information

### Hybrid Phytoglycogen-Dopamine Nanoparticles as Biodegradable Underwater Adhesives

Jiayi Liu, Dmitrii Sychev, Nadiia Davydiuk, Mahmoud Al Hussein, Andreas Fery and Quinn A. Besford\*

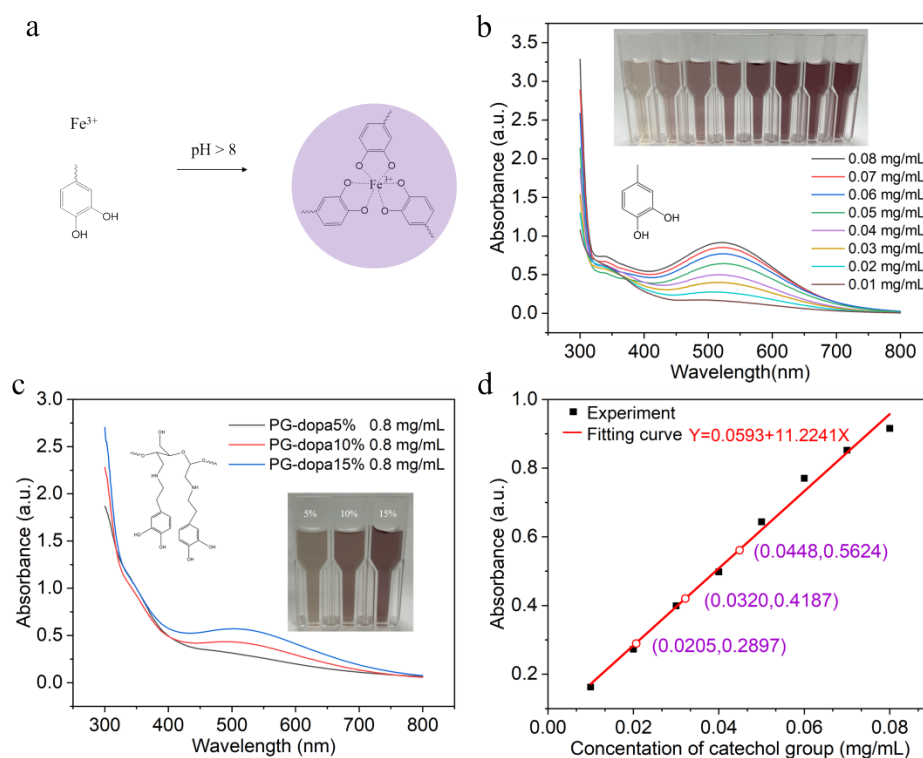

Figure S1. a) The solution of  $\text{Fe}^{3+}$  and catechol group turns to purple at  $\text{pH} > 8$ . b) UV-vis spectra of 4-methylcatechol with different concentration, the concentration of ferric chloride is 0.05 mg/mL, pH 8 in carbonate buffer. c) UV-vis spectra of different PG-dopa, the concentration of PG-dopa is 0.08 mg/mL, the concentration of ferric chloride is 0.05 mg/mL, pH 8 in carbonate buffer. d) The UV-vis absorbance intensity of 4-methylcatechol (black square dot) and PG-dopa (hollow red circle) at wavelength 525 nm as a function of the catechol group concentration.

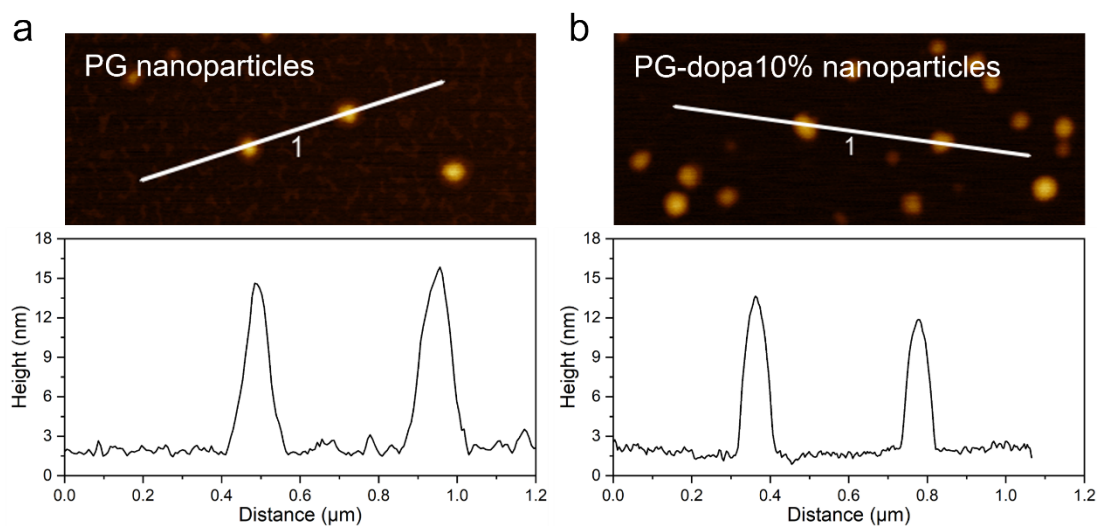

Figure S2. The height of PG and PG-dopa10% nanoparticles by AFM topography images.

Table S1. The Z-Average, distribution and zeta potential of PG and PG-dopa10% nanoparticle water dispersion from DLS measurement

|            | Z-average (nm) | Distribution (PDI) | Zeta potential (mV) |
|------------|----------------|--------------------|---------------------|
| PG         | 71.52          | 0.084              | -2.04               |
| PG-dopa10% | 111.4          | 0.239              | -15.0               |

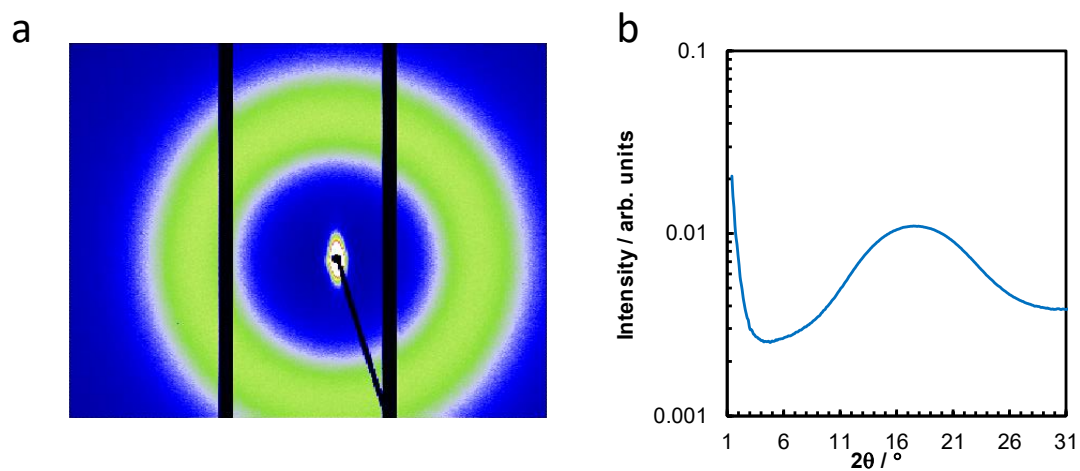

Figure S3. a) 2D WAXS pattern of PG-dopa10% sheet. b) Corresponding radially integrated profile of the 2D WAXS pattern indicating the amorphous nature of the PG-dopa10%.

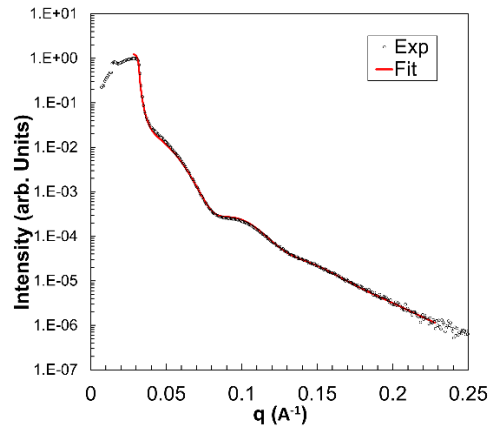

Figure S4. XRR of PG-dopa10% coating on silicon wafer.

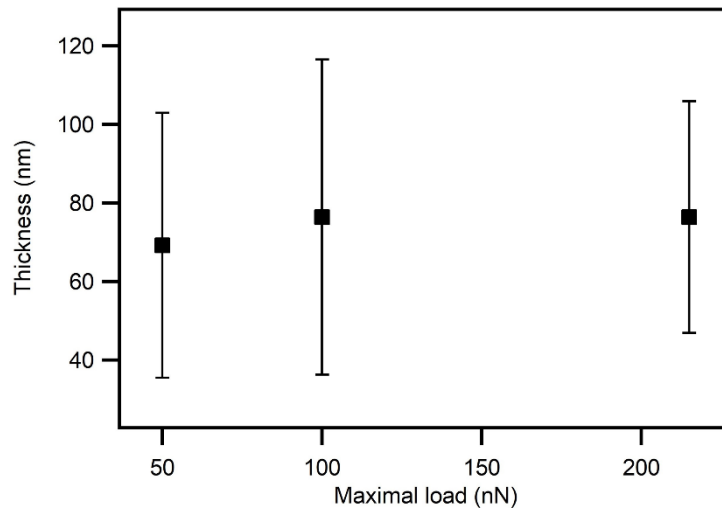

Figure S5. The maximum deformation (thickness) of PG-dopa10% coating by colloidal probe AFM at different load forces.

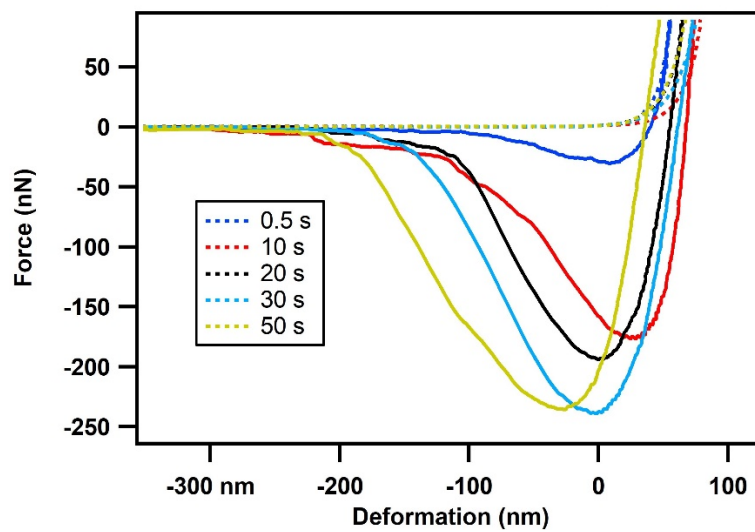

Figure S6. Representative force-deformation curves recorded on PG-dopa10% coating. The dashed line represents the approach part and the solid line represents the retraction part of the force-deformation curves.

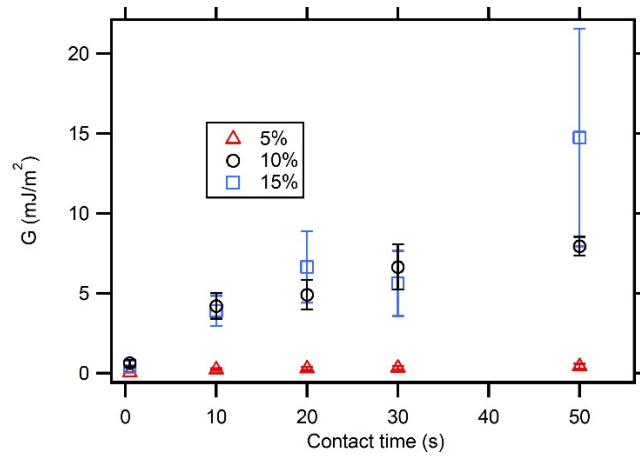

Figure S7. The strain energy release rate  $G$  of PG-dopa5%, PG-dopa10%, PG-dopa15% coating as a function of contact time.

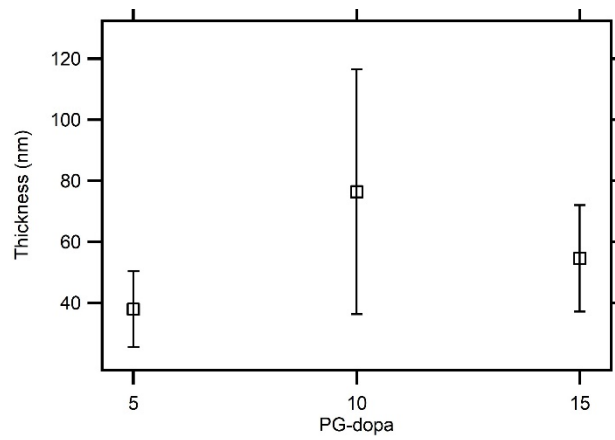

Figure S8. The maximum deformation (thickness) of PG-dopa5%, PG-dopa10%, PG-dopa15% coating by colloidal probe AFM.

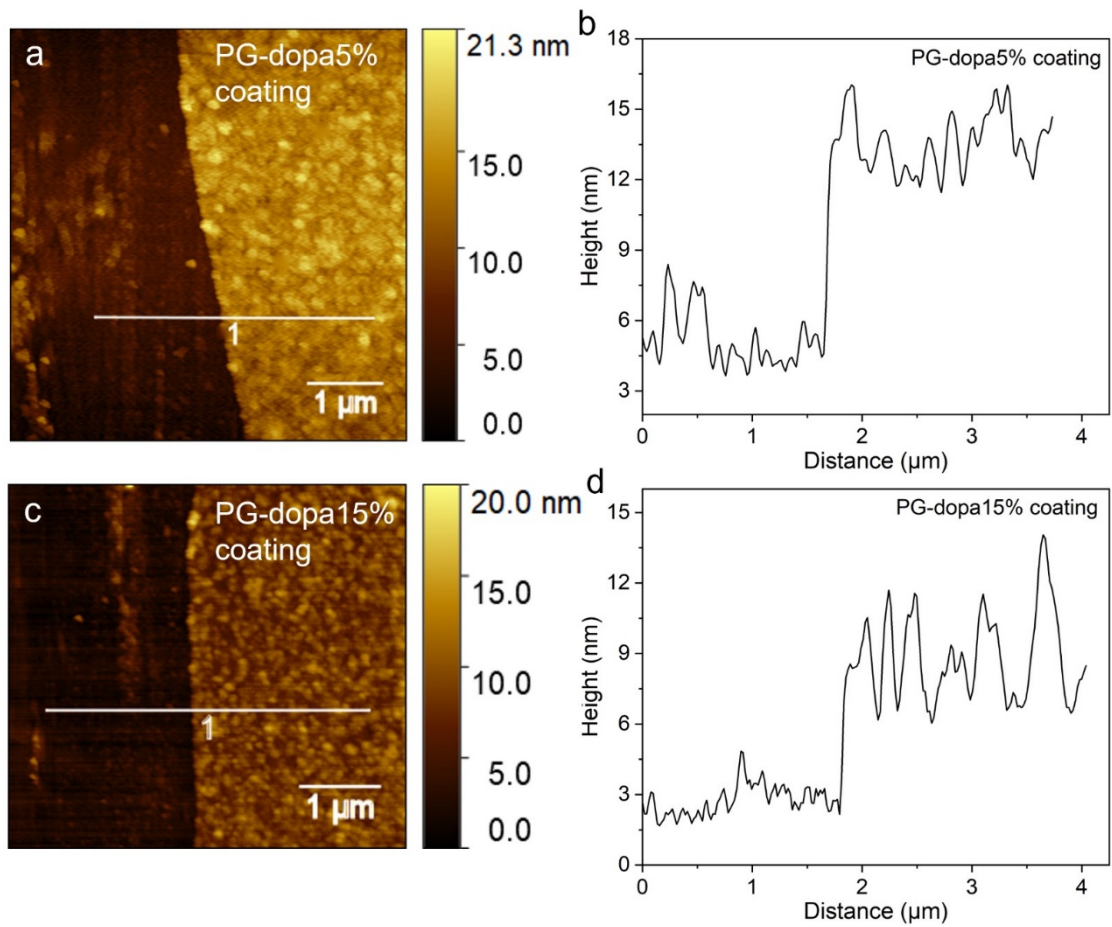

Figure S9. AFM topography image of a scratch of (a) PG-dopa5% and (c) PG-dopa15% coatings on silicon wafers, with corresponding line profiles (b) and (d), respectively.

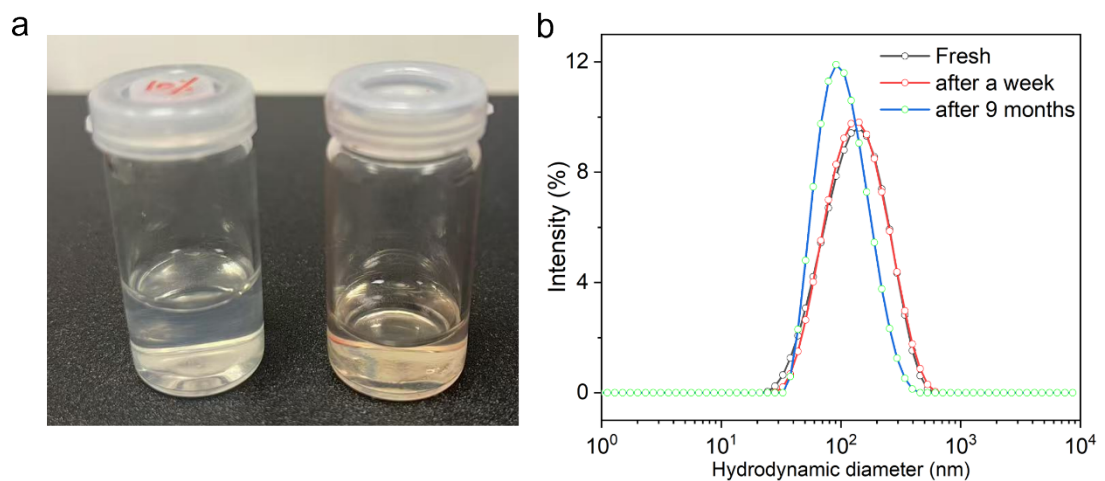

Figure S10. a) A fresh PG-dopa10% water dispersion (left) and the PG-dopa10% water dispersion after storing in the 4 °C fridge 9 month (right). b) DLS hydrodynamic diameter populations of a fresh PG-dopa10% sample and samples after storing in the 4 °C fridge a week and 9 months.
